# Supplementary material for: A responsive photonic crystal film sensor for the ultrasensitive detection of uranyl ions
Source: Royal Society of Chemistry journal article supplement (doi:10.1039/d0an00443j), 2020-01-01
Supplement: d0an00443j1.pdf [file d0an00443j1.pdf]

## Electronic Supplementary Information

### The Responsive Photonic Crystal Film for Ultrasensitive Detection of Uranyl Ions

Qianshan Chen, Changping Wang, Shihong Wang, Jun Zhou, Zhaoyang Wu\*

\*State Key Laboratory of Chemo/Biosensing and Chemometrics, College of Chemistry and Chemical Engineering, Hunan University, Changsha, 410082, China.

E-mail: [zywu@hnu.edu.cn](mailto:zywu@hnu.edu.cn)

## Results and Discussion

Figure S1

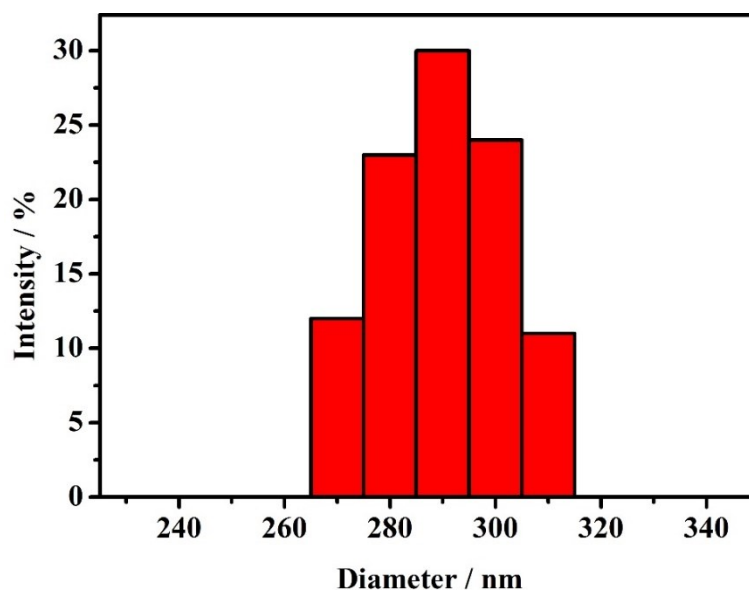

Figure S1. The DLS image of AO-PMMA-AN nanospheres in aqueous solution.

Figure S2

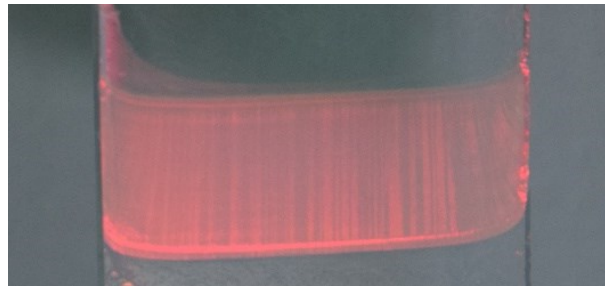

Figure S2. The optical image of the AO-PMMA-AN PC film shows a bright structure color.

Figure S3

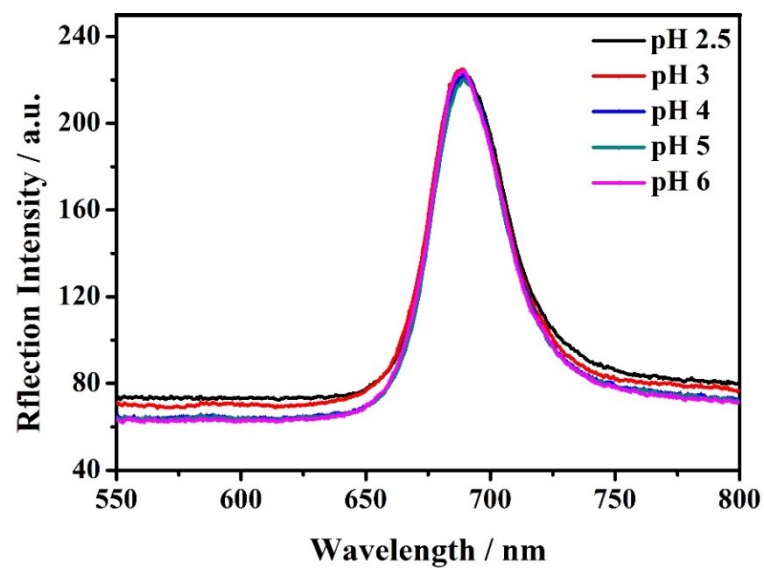

Figure S3. The reflection intensity of the AO-PMMA-AN PC film in blank buffer with different pH.

Figure S4

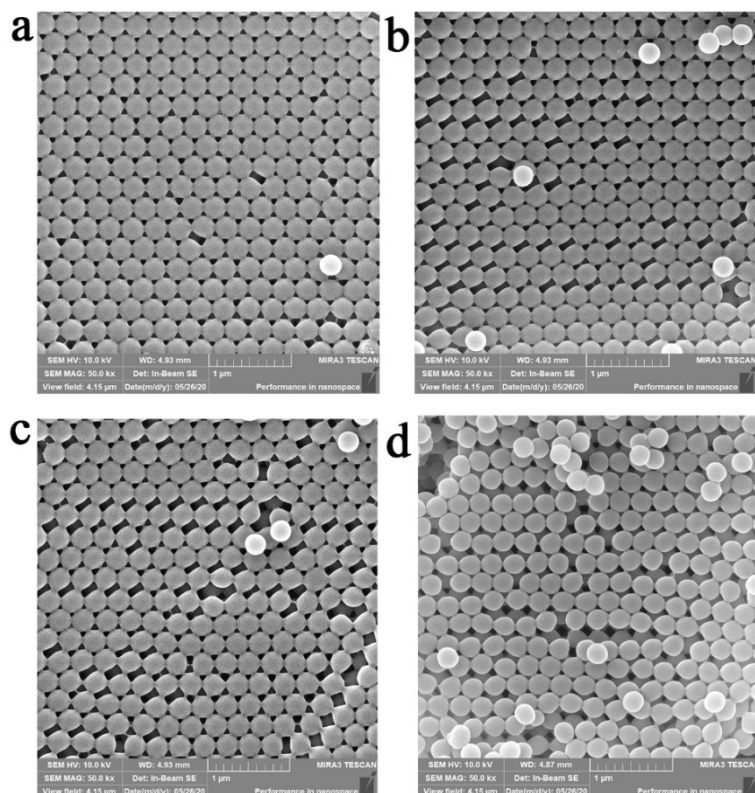

Figure S4. The SEM images of the PC film at different concentration of  $\text{UO}_2^{2+}$ . (a) - (b) represents the detection concentration of  $\text{UO}_2^{2+}$  is 10 pM, 1 nM, 100 nM and 10  $\mu\text{M}$  respectively.

Figure S5

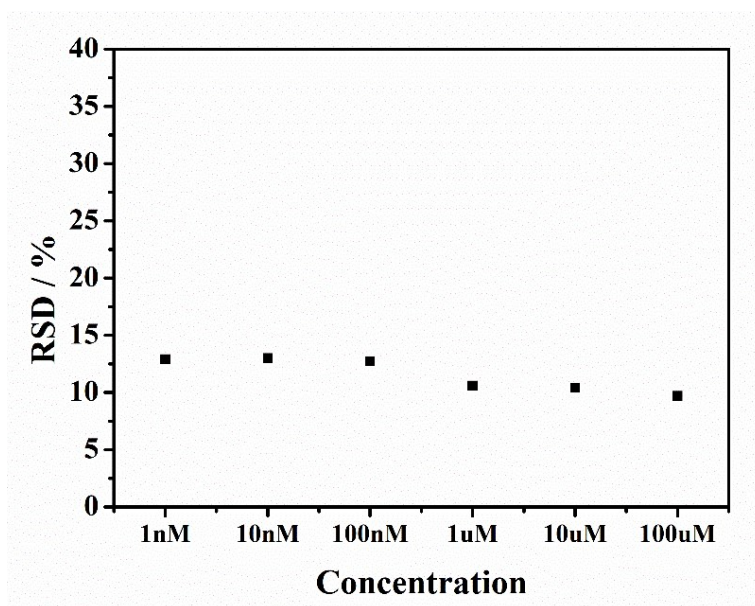

Figure S5. The RSD values of measurements are 12.9%, 13.0%, 12.7%, 10.6%, 10.4% and 9.7% respectively when the concentration of  $\text{UO}_2^{2+}$  was from 1nM to 100  $\mu\text{M}$  respectively.

Figure S6

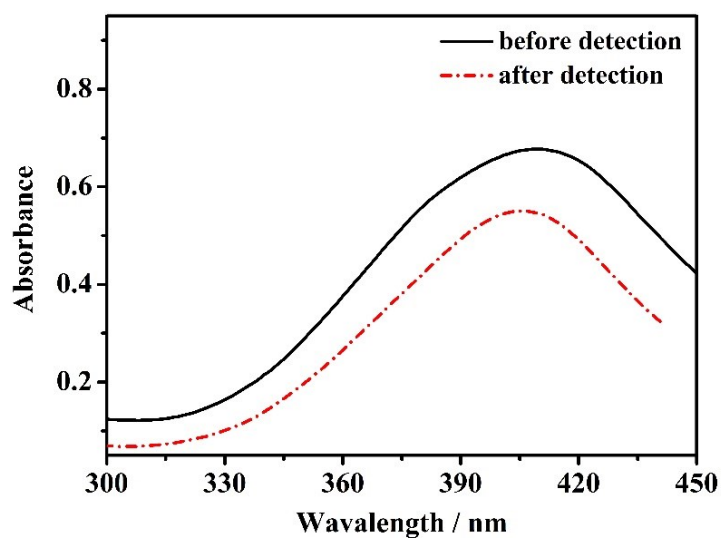

Figure S6. The change of  $\text{UO}_2^{2+}$  concentration (the initial concentration is 10  $\mu\text{M}$ ) is detected before and after binding with the AO-PMMA-AN PC film.
